# Supplementary material
Source: PubMed Central journal article supplement (PMC2893227)
Supplement: NIHMS69239-supplement-01.pdf [file NIHMS69239-supplement-01.pdf]

-2921 ACATGTTGCT ATTTGCAATACTTTGCAT **TGACC**AAAAGGACCCTAAACTGTGTGGGAAAAAGC **TGACC**  
 TCACAAGCGACCT ACTCTGTA CCGCATCCTA TAACACTCTCACAATGACAGATGTATAGAG G G  
 GTTCTGTTGGTAGTTTCTGGGCTAATGGGAGACAGAGCTCAGACA GAAAGGAATGAAGGGAATGG  
 AAGGGAATGGGGCATGAAGTAGCTTTTGTAT **GGCTGG**GGGC GGTT **CTGCC**TCTTGTGTATGGTG  
 GTGGCACCT**TGACTCC**ATCCATCAA CACGTG CAT**TGCGTCA** GAGTACACACACACTGAGATCT  
 GACTGTGGTCTGAGTGTTTGCAATTCCTGT CTTATCA AAATCAGTAACCTACTTCTTGTCTTCTGT  
 ATAGTTATGA **TGATGTAAT**CGCCACAAGAAGCTGAGTG **GGGTGG** TCCATGGGACTTAACACTTTC  
 TGTGAGTCTAAAA TTATCT CAGAAAGTTTTTATACAAGCATAAAGAAATTAAGATTCCCCTCTAGA  
-2403 GAGATGGCTCAGCAAGTTAAGAGCATTGGCTGCTTTCAGAGGACATAGGTTCTATTCCAGTACC  
 TAGCTGAGTGGCTCACACCAAGGTAACCCAGCCCCAGTGCAGATGCCCTCTTCTGGTCTCAG  
 TAGGCAACAGCAGCTCATATGTAGACACACACACACACACA CACACACACACATAGAAATATTTTTAA  
 TTATCCTTTTTCTTACATATACTTAAGGAATACAACATGACATTTTGTATACCTACACACAATGAAAT  
 TGTGACGATAGT**TAACTCA**GCATCTCTACTCTTTGGGGGGCACTCTAAAGTCTTACTATGGGCTGTT  
 AGCAATTGGATGAGACAGTCCAGAGCGAGCACGGTCCACTCTGAG GGTGTA CAAGCTTTTACCT  
 TTAATATTCTACATAG**AGATAG**AAACCTCTGACTTCAATGGCTGCTTCCCTGTGGCACACATTGCC  
 AGGTCTGTGG**TGACACA**ATGTGGCCGTTTTGAATACGGCAGCCTCTGAGTTGAGAGCTCCTCCTT  
 CAGATCTCACAGAGGACAAT CTATCA CAACAGCCTGACTAGCCAGGCCAGAGAGACAACGTTAAC  
-1800 TATGACAGCTGGGAACCTTTCTAGATGTGGA CCGCAGCCTCCT GCAGCTGCTCGTCTTCTGGATGGC  
 CAGCGGAAGACCTGTTGTTCCCAAGACACTCATCAGAGGCAATGTCTTAAAGC CGTCCAGATT  
 CAGGGGTGCCTGGGTAGTTGTAATGTCTTTTTAATATTTTAAAAATTTCTTCTTATATTCTGCTTG  
 TGTGCATACAGAGAGAGAGAGAGGTTTTTTTT TCTTTTTGTTTTGTTTTGTT TTTTGTATTAGTTT  
 GTTGCTTT**TTAGGAAAT**TTCAAATAAGAAATGTGTGTGTGATGAATTTTTTGTAGATATGGCTATAC  
 TACATGGCTCAGGTTGGCTTTGGCTTTGAACTCTTCCACTTCTGCTTCTGAGTCCAAGGTTGCAGA  
 CATATATCACTGTTTCTGTCTAAGCTCTATACTCAAGGAGTCCAATG**TGACC**GTTGGATATAAAGTA  
 CGTAGGGCAATGGTCTGCTCCGCGGAGATTTACTCTCCGTTTACACACCCATTAGCCTATTTACAC  
 A**CCCACC**CATGTCTTCATTTCCAGGCTTGGAGAAGAGTCTCCTTAAATGTCAAGGGCATGGGATCC  
-1195 TTTCAAAGGACTTCTTAAGGTGGCAGAT**GGTCA**GCTGTGGTGGATCAGAGGAGTGAGTAGAGGGAA  
 CCTATGGTGACAAGACCGATCCCAGGGCC **GGCTGGG**AATTGTTCTTCTGCTAGAT **CTGCC**A  
 ATCCGTGCCTCTGCTGCATCAGAGCCAGCAGT**TGTTTCA** GCACTGAAGGCAT **CTGCC**ACAGA GA  
 TTAGTAA TGAAGACCGATGTCAAAAAGGACTAT CCGTCCCCAAA**TGATAG**ACCATTTCAGTAAATA  
 CGGAACGAAAATCGATTAATAACATTTACTCCA AAACAAATTAATATTTTGTCTTGTGCATAACTGT  
 AATA ATTCTCT GTATCT TAAATATCCTTGAATAAT TTAATTTTTCAAAGGATTTTTGTCTATAAA  
 ATAGAGATATGCTGGGCTTTTTAATTACATTTTGTAGTTGCCATACAAAATAATGGACTTCGTTGTG  
 TAGCTCA GTGGTAGGGCACTTGAAGACTCTTC**TGAGTAA****CCCACC**CACACCCT**CCCAAG**ACAC  
 ACACATCACCT**CCCAAG**ACATACACATACAAACACATACACACATACACATACCCACATACACAC  
-602 ACAAAACCATATACATAC AGATAC CCATACACACAAACCACTCACATACACATACCCACA  
 TATACACACAAACCATACACATACCCATACCCACATACATACACATACACAC CACACACACATG  
 TATTTTCATCAAATGTTGTTAATCCTCACATTCCTGCTACCCCTGGTCCCTCTTCTGCTCTGGTGTG  
 CAGTTAGTTTCTCTCCCAAACCTTTTCCCTTATTCACTCAAGCACACATGGATGCACACATCACACA  
 CAAATAAATATACAAATAAATAAATAAATAAGTACTGTTGGAGAAATAAG**TCTAGTGG**CCATGTGGG  
 AATCAACAGTACAAATA**GGGTGG**ACAAGCAAAGCCTGGAAGACAGCGGTGCAGGCCAGGTGACAG  
 ATGATGCAAAGATGCTGGCTTAAGGTGACTAGCAGCTTAATCCCTTCCCAAACCTG**TGACC**GTGAC  
 GACCTGCATGGGAAATGGGCCTCACAGGGATGACAGCTAAGAATCTCCA**GGTGGG**AGGGTTGTTCTG  
 TATTATCC**GGGCAAGCTGACC**CAGTTGTAAGGACT**TTAATAGAT**GTGATGGGAG**GGTCA**GA  
 ↗**TSS+1**  
G **TG**AGGCAAGATGTGAGCACAACTGGAGCAAGGGTGACTCGATGCCAGGAAGAGAGCAGCCAA

**Supplementary Figure 1.** Transcription factor binding sites in -2921 nt upstream of KCNE2 TSSs (red font and underlined). The predominant start site T is bold and marked with an arrow. All numbering are based on this site (+1). The potential TATA box is in blue font and underlined. Transcription factor binding sites that were identified using Transcription Element Search Software (TESS) and MatInspector are highlighted. Green box, ERE and ½ EREs; grey box, AP-1; magenta box, Sp1; yellow box, GATA; olive box, C/EBP $\alpha$ ; orange box, C/EBP $\beta$  and blue box, NKX2.5. The mismatches in TATA box and in full ERE are shown in lowercase letters.
