# Supplementary material
Source: PubMed Central journal article supplement (PMC2893227)
Supplement: NIHMS69239-supplement-02.pdf [file NIHMS69239-supplement-02.pdf]

↗ TSS  
 1 TCGAGGCAAGATGTGAGCACAACCTGGAGCAAGGGTGACTCGATGCCAGGAAGAGAGCA  
 61 GCCAAGAAATGCTGGCCCTGGGAAGTCAAGGAAATGGGTCGCAGAAGCTCTGGTGACAT  
 121 CTTGACTTTACAGAGGCTCAGTTTGGAAACATTAAGATAAGAAGTTCGTGTAAGTCAGTAA  
 181 TCTTGTAAATTGGTTAGTGTGGCCACAGATCCTATAGCAAAAAGAGGTTCCAGGGGAAGAAGG  
 241 ATTCCTCTGTCATATCATAGTCTCAATCTGTCTTGTGAATTGTGTAGTGGGGTGTGGGTG  
 301 AGAGGGATCCTAAAATAAACTGCTTGAGAGCAGTAGCTCATGTGGCTCCAGAACATTCTT  
 361 TTCTGGATGGCGACTTTCATTGCCCTTCTGCTGGCTTCCATTGCTGTGGAGGTGCCCAT  
 421 AGCTCTACCATAAAACCAGTTGTCTCTCCCTGGTTGGCTTTTGCCTTGTCTTATGCAGGG  
 481 AACAAAGGGTATCCTGGGAAGTTGGTGCAGCGCTATCTGGGGAAACAGCTCAATGAAAGA  
 541 CTTGCCTAGATCAGATTGGCCTGAGTGTGTCTGTGAGGGACTGTCTTTGTTGTTAACTGG  
 601 TGCAGGAGGGCATCCTGAGTCTCTGTTGTGGAATGCTCCGAGCATGGCTTCCATCTTGAT  
 661 CAGAATAGACGTTGACCACCTCTGACCCTCAACAAGATGGCTGCTGGAGCCCACAGACCT  
 721 TCCCTTCGAGGTGTTGGGGAGGCTCACAGGACTTCGTTTGAGATTCTATCACTCACTCT  
 781 GTTCTGTACCCTCCCCTCCTGGCAGTATGCAATCCAGATCAGGAGGTGCTGACTATATAC  
 841 GGTGCGGACCATTGGCTGAAGGGTTGGAGGCTCCATCCATGCAGCCCTGGGGAAATCTTC  
 901 ATCCAATCATGGGTGGAGACGCCTTAATTGTGCAGCCATTGGGGGAATACCAACAGTTCT  
 961 GTAAGGAATCTCTCATCCACAATCCTGTAAGCAACTCTAATATGCTCATTGGTTCACCAA  
 1021 GATGGACGTGGGTGGAATCCTTACTTTTGTCCATCACTGACGCCCCATCTGGGGTAAGCA  
 1081 GGTGTCCACCCGCATCTCCCCAGGAAAAGTTCACATAACTGTCACACAGAGGGAACTTGA  
 1141 GCCACTTCACCCACAGCCCGACGTACACAGGCAACTCCGTGCCCCGCCCTGTCAAGGCA  
 1201 TCAAGGTTAATTCCCGGCTGCCAGCCAGTATTTAACTTTCCACGTAAGATTAAACGTTTG  
 1261 GATTTGTAAAAAGCCAGCATTGCAGACTCCAGGCAGCAGGGCTTACAGGTCTCAAGCTG  
 1321 AAAGTGCCAGCCTGCTGAGATTTACATCCAGTCCTGAAGAGGGGCAGAGCCTGGCTTTC  
 1381 TGAAGGTCTCCTGCATTGCTCACATACCACACAG

**Supplementary figure 2.** KCNE2 Exon 0, retained intron and exon 1 sequence. Blue letters, Exon 0; red letters, retained intron and green letters, exon1. Underlined letters, transcription start sites and the predominant start site is marked with an arrow.
